# Supplementary material
Source: PubMed Central journal article supplement (PMC4512197)

## SUPPLEMENTARY DATA

**Fig. S1.** Total biomass of mature *S. dulcamara* plants originating from wet and dry habitats in Vooorne and Texel in control, shallow flooding and deep flooding treatments ( $n=10$ ). In each treatment, the habitat effect within location was examined with a Student's *t*-test. Significant differences are indicated by star symbols (\*\* $0.001 < P < 0.01$ ).

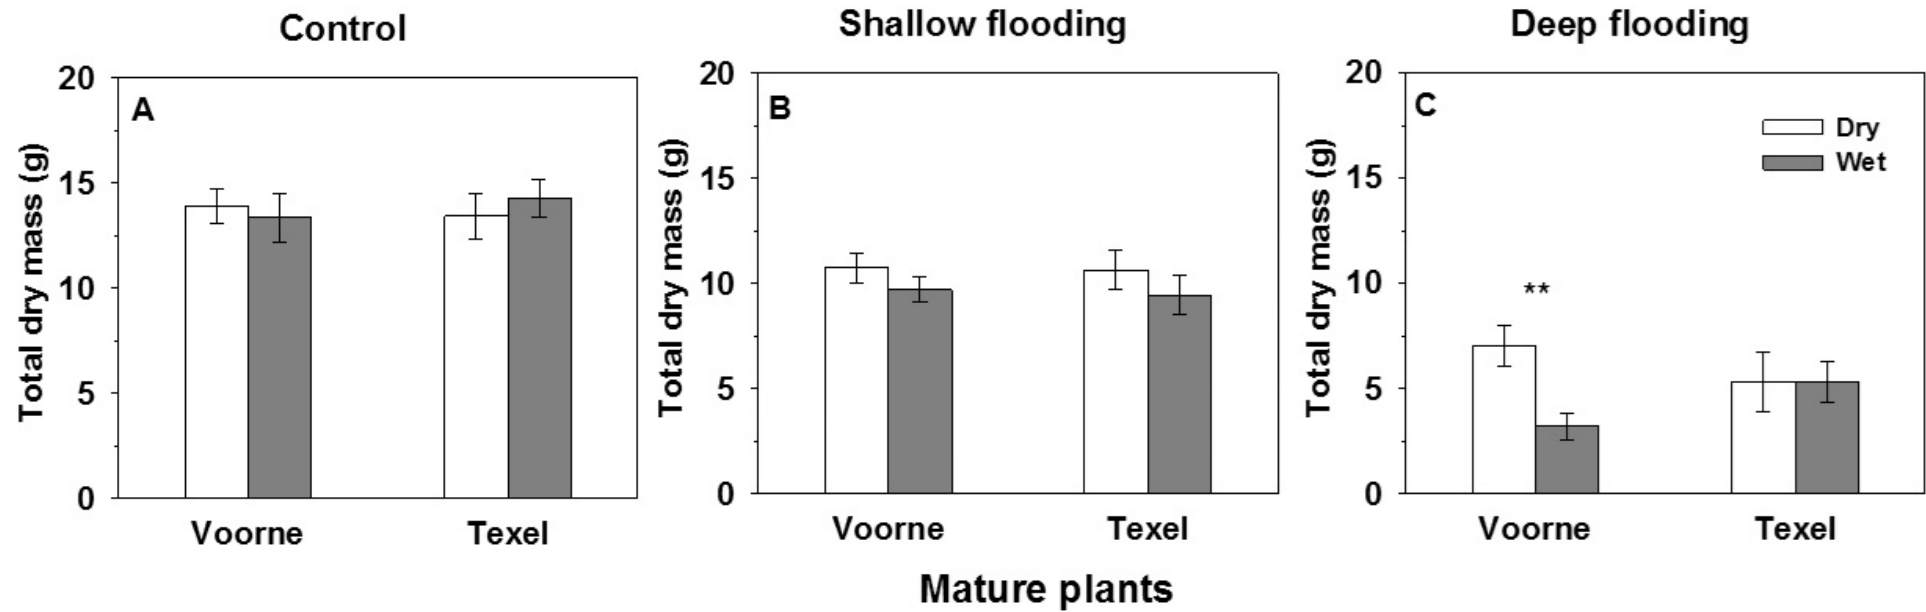

**Fig. S2.** The total biomass, root to shoot ratio and stem height of juvenile *S. dulcamara* plants originating from Voorne and Texel in control, shallow flooding (Shallow) and deep flooding (Deep) treatments ( $n=20$ ). For each treatment, the location effect was examined with a Student's *t*-test. The significant differences are indicated by star symbols (\*\*\*)  $P < 0.001$ ,  $*0.01 < P < 0.05$ ).

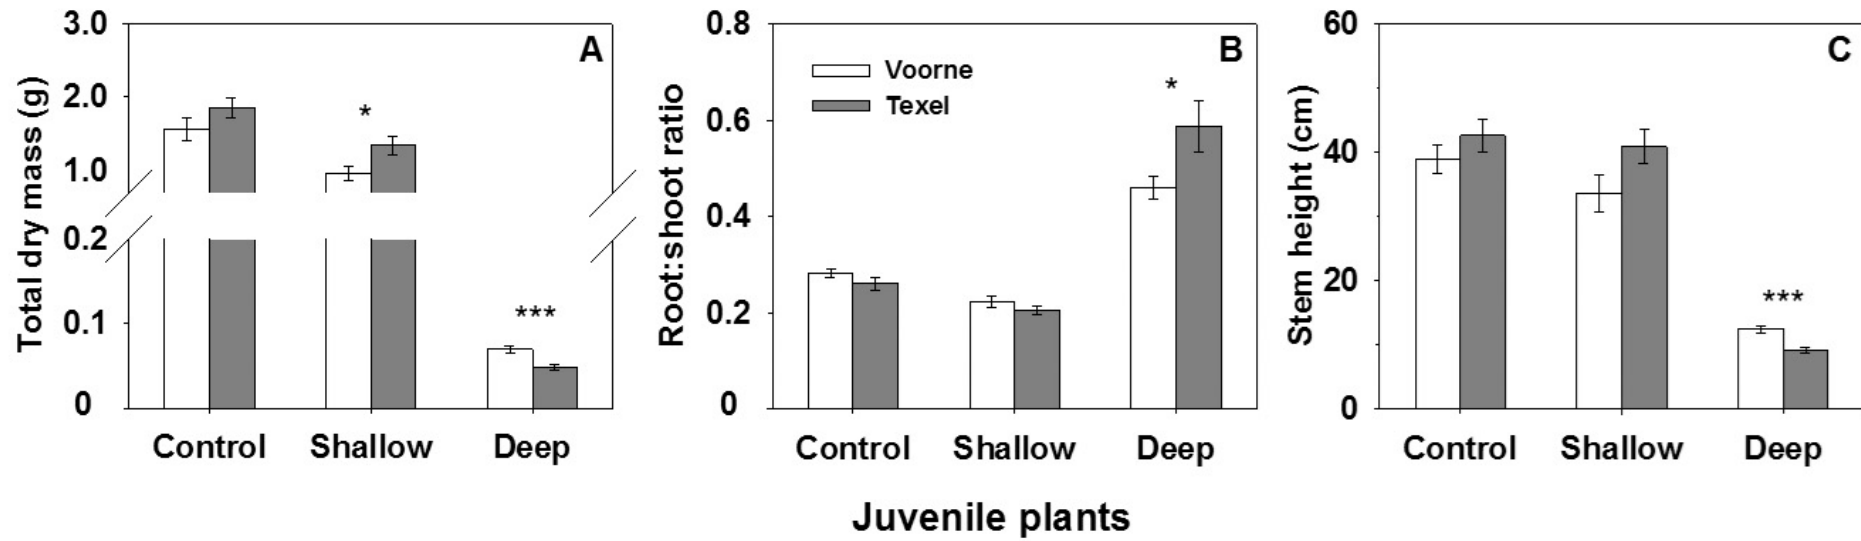

Supplement: supp_mcv095_aob-15187-s01.pdf [file supp_mcv095_aob-15187-s01.pdf]
